# Supplementary material
Source: PubMed Central journal article supplement (PMC4260350)
Supplement: cr2014152x2.pdf [file cr2014152x2.pdf]

**Supplementary information, Table S1A.** RNA-binding affinities of wild-type and mutant YTH<sup>YTHDF2</sup>

| YTH <sup>YTHDF2</sup> | m6A RNA                          |                                  |             | A-RNA<br>One-step binding mode<br>Kd (μM) |
|-----------------------|----------------------------------|----------------------------------|-------------|-------------------------------------------|
|                       | One-step binding mode<br>Kd (μM) | Two-step binding mode<br>Kd (μM) |             |                                           |
|                       |                                  | First step                       | Second step |                                           |
| wild-type             | 6.90                             | 2.54                             | 79.13       | 21.39                                     |
| R411A                 | 17.26                            | 7.81                             | 1063        | 51.58                                     |
| R441A                 | 19.20                            | 7.35                             | 302         | 44.32                                     |
| K416A                 | 62.75                            | -                                |             | 112.7                                     |
| R527A                 | 62.94                            | -                                |             | 222.0                                     |
| W432A                 | 16.46                            | -                                |             | 15.16                                     |
| W486A                 | 17.61                            | -                                |             | 17.81                                     |

FP assays were performed using wild-type and mutant YTH<sup>YTHDF2</sup> toward unmodified RNA (A-RNA) and m6A-RNA. The binding affinities were calculated according to one- and two-step binding modes as indicated in Figure S1A.
