# Supplementary material
Source: PubMed Central journal article supplement (PMC4260350)
Supplement: cr2014152x3.pdf [file cr2014152x3.pdf]

---

**Supplementary information, Table S1B** Crystallographic data and structure refinementstatistics of YHT<sup>YTHDF2</sup>

---

**Data collection and refinement statistics**

---

| <b>Data collection</b>             |                                                                                         |
|------------------------------------|-----------------------------------------------------------------------------------------|
| Wavelength (Å)                     | 0.97915                                                                                 |
| Resolution range (Å)               | 50.0-2.12(2.2-2.12) <sup>a</sup>                                                        |
| Space group                        | P6 <sub>5</sub>                                                                         |
| Unit cell                          | a=76.69, b=76.69, c=131.24<br>$\alpha=90^\circ$ , $\beta=90^\circ$ , $\gamma=120^\circ$ |
| Total reflections                  | 259897                                                                                  |
| Unique reflections                 | 24637                                                                                   |
| R-merge                            | 0.119 (0.893)                                                                           |
| I/sigma(I)                         | 12.81 (3.27)                                                                            |
| Completeness (%)                   | 99.54 (99.47)                                                                           |
| Redundancy                         | 10.5(9.5)                                                                               |
| <b>Refinement</b>                  |                                                                                         |
| R-work                             | 0.1860                                                                                  |
| R-free <sup>b</sup>                | 0.2214                                                                                  |
| Deviation from identity            |                                                                                         |
| rmsd (bonds, Å)                    | 0.008                                                                                   |
| rmsd (angles, °)                   | 1.043                                                                                   |
| Average B-factor (Å <sup>2</sup> ) | 47.10                                                                                   |
| Ramachandran plot                  |                                                                                         |
| Most favored regions (%)           | 88.1                                                                                    |
| Allowed regions (%)                | 11.9                                                                                    |
| Generously allowed regions (%)     | 0                                                                                       |

---

<sup>a</sup> The values for the data in the highest resolution shell are shown in parentheses.

<sup>b</sup> R-free =  $\sum \text{Test} ||\text{Fobs}| - |\text{Fcalc}|| / \sum \text{Test} |\text{Fobs}|$ , where “Test” is a test set of about 5% of the total reflections randomly chosen and set aside prior to refinement for the complex.
